# Supplementary material
Source: HighWire-hosted journal article supplement (https://spcare.bmj.com/content/14/1/47)

12/08/2020

Virtual Reality in Palliative Care feedback - Google Forms

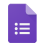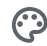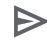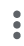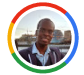

## Virtual Reality in Palliative Care feedback

Questions Responses 7

Section 1 of 2

### Service evaluation for the Virtual Reality (VR) in Palliative Care project

This questionnaire aims to gain staff perspectives of the Virtual Reality (VR) in palliative care project. This was a Global Digital Exemplar (GDE) test bed project which took place in the Royal Liverpool University Hospital and Marie Curie Hospice Liverpool between 2018 - 2019.

Please complete the short questionnaire if:

- You are a healthcare professional who provided care for a patient or caregiver who participated in the VR project.

After section 1 Continue to next section

Section 2 of 2

### Virtual Reality Evalutaion

Please answer the following questions

Which site were you based? \*

- Marie Curie Hospice Liverpool
- Royal Liverpool University Hospital

What is your role \*

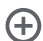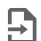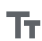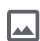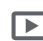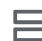

12/08/2020

Virtual Reality in Palliative Care feedback - Google Forms

- Nurse
- Health Care Assistant
- Other

If other please state role

Short answer text

Based on your experience of the the VR project, how would you rate the helpfulness of VR \*  
for participants?

|             |                       |                       |                       |                       |                       |              |
|-------------|-----------------------|-----------------------|-----------------------|-----------------------|-----------------------|--------------|
|             | 1                     | 2                     | 3                     | 4                     | 5                     |              |
| Not helpful | <input type="radio"/> | Very helpful |

In your own words, describe what went well? \*

Long answer text

In your own words, describe what didn't go well? \*

Long answer text

Following the end of the project, have you recommended VR for use by your patients? \*

- Yes
- No

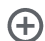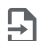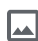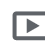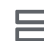

12/08/2020

Virtual Reality in Palliative Care feedback - Google Forms

Please explain why \*

Long answer text

Would you use VR again for patients/relatives? \*

Yes

No

Please explain why \*

Long answer text

What are the barriers that prevent use of routine VR in palliative care? \*

Short answer text

Are there any new ways we could use VR in palliative care? \*

Short answer text

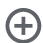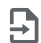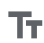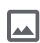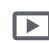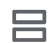

Supplement: inline-supplementary-material-3 [file inline-supplementary-material-3.pdf]
