# Supplementary material
Source: HighWire-hosted journal article supplement (https://spcare.bmj.com/content/14/1/47)
Supplement: inline-supplementary-material-2 [file inline-supplementary-material-2.pdf]

Palliative Care Institute

Liverpool

**APPENDICES****DATA COLLECTION SHEET: Evaluation of the Virtual Reality (VR) intervention (Version 2: 08/08/2018)****Virtual reality in palliative care – a quality improvement test-bed project**

Participant number:

Age: Sex:

Diagnosis:

Reason for VR:

Date of assessment:

|                                                                                                                                                                               |
|-------------------------------------------------------------------------------------------------------------------------------------------------------------------------------|
| <b>Media chosen</b>                                                                                                                                                           |
| Relax VR beach <input type="checkbox"/> Rollercoaster <input type="checkbox"/> Forest of serenity <input type="checkbox"/><br>Other (please state) <input type="checkbox"/> : |
| <b>Length of time the equipment was used</b>                                                                                                                                  |
| 0- 5 minutes <input type="checkbox"/> 6 – 10 minutes <input type="checkbox"/> 11 – 15 minutes <input type="checkbox"/> >16 minutes <input type="checkbox"/>                   |
| <b>Participant's reaction to VR</b>                                                                                                                                           |
| Good <input type="checkbox"/> Poor <input type="checkbox"/> Indifferent <input type="checkbox"/>                                                                              |
| Please explain:                                                                                                                                                               |
| <b>Problems/complications</b>                                                                                                                                                 |
| Yes <input type="checkbox"/> No <input type="checkbox"/>                                                                                                                      |
| If yes please state:                                                                                                                                                          |
| <b>Other comments:</b>                                                                                                                                                        |
|                                                                                                                                                                               |
| <b>Questions for the participant</b>                                                                                                                                          |
| <b>What did you think of the VR experience?</b>                                                                                                                               |
|                                                                                                                                                                               |
| <b>What did you like?</b>                                                                                                                                                     |
|                                                                                                                                                                               |
| Can you tell me about any part of the VR experience you didn't like?                                                                                                          |
|                                                                                                                                                                               |
| <b>Would you want to use this again?</b>                                                                                                                                      |
| On Response - if so/not, what are the reasons for this choice                                                                                                                 |
|                                                                                                                                                                               |
| <b>What could we do differently next time to improve the experience?</b>                                                                                                      |
|                                                                                                                                                                               |

**PARTICIPANT INFORMATION LEAFLET DATA COLLECTION SHEET: (Version 2: 10/05/2018)**
