# Supplementary material
Source: HighWire-hosted journal article supplement (https://spcare.bmj.com/content/14/1/47)
Supplement: inline-supplementary-material-4 [file inline-supplementary-material-4.pdf]

**Appendix: Public engagement event discussion - questions for organisations to consider to support VR adoption in palliative care**

| Questions for organisations to consider about VR adoption | Description                                                                                                                                                                                                                                                |
|-----------------------------------------------------------|------------------------------------------------------------------------------------------------------------------------------------------------------------------------------------------------------------------------------------------------------------|
| What is the purpose of VR?                                | <ul style="list-style-type: none"> <li>• What is VR being used for? E.g. Distraction from symptoms, treatment of condition (e.g. phobia), education, entertainment, escapism, information (e.g. hospice tour)</li> </ul>                                   |
| Who is VR for?                                            | <ul style="list-style-type: none"> <li>• Is VR aimed at patients, caregivers, students, staff and the public etc.?</li> <li>• The technology, infrastructure, software and evaluation need to be tailored appropriately to the target audience.</li> </ul> |
| What evidence is available to support use?                | <ul style="list-style-type: none"> <li>• Is there adequate evidence to support use for the intended target population and purpose?</li> <li>• Is there information about the efficacy, effectiveness and safety?</li> </ul>                                |
| What is the duration of use and repeatability?            | <ul style="list-style-type: none"> <li>• Is there information on how long the VR should be used for?</li> <li>• Should VR be repeated and if so, how often?</li> </ul>                                                                                     |
| How will VR be evaluated?                                 | <ul style="list-style-type: none"> <li>• How and when should VR be evaluated?</li> <li>• What outcomes should be used for the evaluation?</li> </ul>                                                                                                       |
| How will the equipment be chosen?                         | <ul style="list-style-type: none"> <li>• What type of VR equipment is best suited for the intended population and purpose?</li> <li>• Should high immersion (less portable) or low immersion (more portable) systems be used?</li> </ul>                   |

|                                             |                                                                                                                                                                                                                                                                                                                                                                                                                        |
|---------------------------------------------|------------------------------------------------------------------------------------------------------------------------------------------------------------------------------------------------------------------------------------------------------------------------------------------------------------------------------------------------------------------------------------------------------------------------|
| What are the infection control issues?      | <ul style="list-style-type: none"> <li>• How will devices be cleaned?</li> <li>• Do the devices conform to organisation's infection control policy?</li> </ul>                                                                                                                                                                                                                                                         |
| How is content selected?                    | <ul style="list-style-type: none"> <li>• How is content created, stored and selected?</li> <li>• Is this appropriate for the intended population and purpose?</li> </ul>                                                                                                                                                                                                                                               |
| Where will VR sessions be conducted?        | <ul style="list-style-type: none"> <li>• Will this be in a dedicated place in the building (e.g. clinic/therapy room) or at the bedside?</li> </ul>                                                                                                                                                                                                                                                                    |
| Who is responsible for conducting VR?       | <ul style="list-style-type: none"> <li>• Who is responsible for ensuring appropriate use of VR and conducting assessments?</li> <li>• What is the plan to train and support others to use VR equipment?</li> <li>• Are there plans for clinical staff to use this equipment? If so, how will this be achieved in a practical manner?</li> </ul>                                                                        |
| What is the plan to maintain the equipment? | <ul style="list-style-type: none"> <li>• What is the plan to maintain the technology?</li> <li>• How will the devices be charged?</li> <li>• Where will the devices be stored?</li> <li>• How will the devices be accessed?</li> <li>• What is the plan to ensure the equipment is running the latest software?</li> <li>• How long will devices be used?</li> <li>• How/when will the devices be replaced?</li> </ul> |
