# Supplementary material
Source: HighWire-hosted journal article supplement (https://spcare.bmj.com/content/14/1/47)
Supplement: inline-supplementary-material-5 [file inline-supplementary-material-5.pdf]

**Appendix: Staff perspectives on virtual reality**

| <b>Characteristic</b>                                                                      | <b>N (%)</b> |
|--------------------------------------------------------------------------------------------|--------------|
| <i>Setting</i>                                                                             |              |
| Marie Curie Hospice Liverpool                                                              | 6 (85.7)     |
| Royal Liverpool Hospital                                                                   | 1 (14.3)     |
|                                                                                            |              |
| <i>Role</i>                                                                                |              |
| Doctor                                                                                     | 4 (57.1)     |
| Nurse                                                                                      | 3 (42.9)     |
|                                                                                            |              |
| <i>Helpfulness of VR</i>                                                                   |              |
| 1 (Not helpful)                                                                            | 0            |
| 2                                                                                          | 0            |
| 3                                                                                          | 0            |
| 4                                                                                          | 4 (57.1)     |
| 5 (Very helpful)                                                                           | 3 (42.9)     |
|                                                                                            |              |
| <i>Following the end of the project, have you recommended VR for use by your patients?</i> |              |
| Yes                                                                                        | 5 (71.4)     |
| No                                                                                         | 2 (28.6)     |
|                                                                                            |              |

|                                                          |         |
|----------------------------------------------------------|---------|
| <i>Would you use VR again for patients and relatives</i> |         |
| Yes                                                      | 7 (100) |
| No                                                       | 0 (0)   |
